# Supplementary material for: Targeting of the Essential acpP, ftsZ, and rne Genes in Carbapenem-Resistant Acinetobacter baumannii by Antisense PNA Precision Antibacterials
Source: MDPI journal article supplement (doi:10.3390/biomedicines9040429), 2021-04-15
Supplement: s1 [file s1]

## Article

# Targeting of the Essential *acpP*, *ftsZ*, and *rne* Genes in Carbapenem-Resistant *Acinetobacter baumannii* by Antisense PNA Precision Antibacterials

Alireza Japoni Nejad <sup>1,2</sup>, Nader Shahrokhi <sup>2</sup> and Peter E. Nielsen <sup>1,\*</sup>

## Supplementary

### Supplementary Tables and Figures:

**Table S1.** (A) Clinical and phenotypic characteristics of the CRAB in this study (MIC µg/mL). (B) Genotypic characteristics of the CRAB strains in this study. The production of carbapenemases is an important mechanism responsible for the carbapenem resistance in *A. baumannii*. The genes encoding carbapenem-hydrolyzing class D β-lactamases (CHDLs), class B metallo-β-lactamases (MBLs) are shown here.

| (A)                  |                           |                           |                           |                           |                             |                              |                                 |                                 |            |
|----------------------|---------------------------|---------------------------|---------------------------|---------------------------|-----------------------------|------------------------------|---------------------------------|---------------------------------|------------|
| Clinical strains.    | Source                    | Imipenem                  | Mero-penem                | Colistin                  | Ciprofloxacin               | Tigecycline                  | Tetracycline                    | Ceftazidime                     | Gentamicin |
| AC1                  | Wound                     | 8                         | 4                         | 1                         | 8                           | 0.5                          | 16                              | 64                              | 8          |
| AC2                  | Wound                     | 16                        | 16                        | 1                         | 16                          | 1                            | 64                              | 64                              | 16         |
| AC3                  | Sputum                    | 32                        | 4                         | 1                         | 8                           | 0.5                          | 16                              | 64                              | 8          |
| AC4                  | Trachea                   | 8                         | 16                        | 1                         | 16                          | 1                            | 64                              | 64                              | 16         |
| AC5                  | Urine                     | 16                        | 16                        | 1                         | 16                          | 1                            | 64                              | 32                              | 16         |
| AC6                  | Blood                     | 16                        | 16                        | 1                         | 32                          | 1                            | 16                              | 32                              | 16         |
| AC7                  | Blood                     | 16                        | 16                        | 1                         | 16                          | 1                            | 64                              | 64                              | 16         |
| AC8                  | Sputum                    | 16                        | 16                        | 1                         | 32                          | 1                            | 32                              | 64                              | 16         |
| AC9                  | CSF                       | 16                        | 16                        | 1                         | 8                           | 1                            | 32                              | 32                              | 16         |
| AC44                 | Urine                     | 16                        | 16                        | 0.5                       | 32                          | 1                            | 256                             | 256                             | 16         |
| AC46                 | Sputum                    | 16                        | 16                        | 1                         | 32                          | 0.5                          | 128                             | 128                             | 16         |
| SSI1104              | NA                        | NA                        | > 16                      | 1                         | > 8                         | 1                            | 64                              | > 8                             | 32         |
| ATCC 19606           | Type strain               | 1                         | 1                         | 1                         | 1                           | 0.5                          | 1                               | 8                               | 4          |
| (B)                  |                           |                           |                           |                           |                             |                              |                                 |                                 |            |
| Clinical Isolates No | <i>bla</i> <sub>IMP</sub> | <i>bla</i> <sub>VIM</sub> | <i>bla</i> <sub>SPM</sub> | <i>bla</i> <sub>GES</sub> | <i>bla</i> <sub>OXA23</sub> | <i>bla</i> <sub>OXA-24</sub> | Is/ <i>bla</i> <sub>OXA23</sub> | Is/ <i>bla</i> <sub>oxa51</sub> |            |
| AC1                  | –                         | +                         | +                         | +                         | +                           | –                            | –                               | –                               |            |
| AC2                  | –                         | +                         | –                         | +                         | +                           | –                            | +                               | +                               |            |
| AC3                  | +                         | +                         | –                         | –                         | +                           | +                            | –                               | –                               |            |
| AC4                  | –                         | +                         | –                         | –                         | +                           | +                            | +                               | –                               |            |
| AC5                  | –                         | +                         | –                         | –                         | +                           | +                            | +                               | +                               |            |
| AC6                  | –                         | +                         | –                         | –                         | +                           | +                            | +                               | +                               |            |
| AC7                  | –                         | +                         | –                         | +                         | +                           | +                            | +                               | +                               |            |
| AC8                  | –                         | +                         | –                         | +                         | +                           | +                            | +                               | +                               |            |
| AC9                  | –                         | +                         | –                         | +                         | +                           | +                            | +                               | +                               |            |
| AC44                 | –                         | +                         | –                         | +                         | +                           | +                            | +                               | +                               |            |

|         |    |    |    |    |   |    |    |    |
|---------|----|----|----|----|---|----|----|----|
| AC46    | –  | +  | –  | –  | + | +  | +  | +  |
| SSI1104 | ND | ND | ND | ND | + | ND | ND | ND |

**Table S2.** *Acinetobacter baumannii* strains that were examined for designing antisense in this study. The target genes ID obtained from GenBank database updated January 2019.

| Strains                        | <i>ftsZ</i> Gene Bank AC number | <i>acpP</i> Gene Bank AC number. |
|--------------------------------|---------------------------------|----------------------------------|
| <i>A. baumannii</i> AYE        | NC_010400.1                     | NC_010410.1                      |
| <i>A. baumannii</i> ATCC17978  | A1S_3331                        | CP000521                         |
| <i>A. baumannii</i> ACICU      | NC_010611.1                     | NC_010611.1                      |
| <i>A. baumannii</i> SDF        | ABSDF3467                       | NC_010400.1                      |
| <i>A. baumannii</i> ATCC 19606 | CP046654.1                      | CP046654.1                       |

**Table S3.** Anti-*ftsZ* BPP-PNA used in this study.

|      |                                                           | Mass(found/calculate) |
|------|-----------------------------------------------------------|-----------------------|
| 5612 | H-(KFF) <sub>3</sub> K-eg1-GAGGCCATGAC-NH <sub>2</sub>    | 4572(4568)            |
| 5615 | H-(KFF) <sub>3</sub> K-eg1-GAGTCCAGGAC-NH <sub>2</sub>    | 4568(4568)            |
| 5613 | H-(R-Ahx-R) <sub>4</sub> -Ahx-GAGGCCATGAC-NH <sub>2</sub> | 4914(4917)            |
| 5616 | H-(R-Ahx-R) <sub>4</sub> -Ahx-GAGTCCAGGAC-NH <sub>2</sub> | 4914(4917)            |
| 5657 | H-(KFF) <sub>3</sub> K-eg1-ATGAGGCCATG-NH <sub>2</sub>    | 4583(4580)            |
| 5658 | H-(KFF) <sub>3</sub> K-eg1-GGCCATGACCT-NH <sub>2</sub>    | 4583(4580)            |

**Table S4.** Anti-*acpP* BPP-PNA used in this study.

|      |                                                         | Mass(found/calculated) |
|------|---------------------------------------------------------|------------------------|
| 5652 | H-(KFF) <sub>3</sub> K-eg1-ATATCGCTCAC-NH <sub>2</sub>  | 4478(4477)             |
| 5653 | H-(KFF) <sub>3</sub> K-eg1-ATACCGCTTAC-NH <sub>2</sub>  | 4478(4477)             |
| 5639 | H-(KFF) <sub>3</sub> K-eg1-TGATTTGCCAC-NH <sub>2</sub>  | 4512(4509)             |
| 5640 | H-(KFF) <sub>3</sub> K-eg1-TGACTTGTTCAC-NH <sub>2</sub> | 4510(4509)             |
| 5823 | H-(kff) <sub>3</sub> k-eg1-TGATTTGCCAC-NH <sub>2</sub>  | 4509(4507)             |
| 5824 | H-(kff) <sub>3</sub> k-eg1-TGACTTGTTCAC-NH <sub>2</sub> | 4509(4507)             |

**Table S5.** Anti-*rne* BPP-PNA used in this study.

|      |                                                        | Mass(found/calculated) |
|------|--------------------------------------------------------|------------------------|
| 5637 | H-(KFF) <sub>3</sub> K-eg1-ACGTTTCATGG-NH <sub>2</sub> | 4549(4540)             |
| 5638 | H-(KFF) <sub>3</sub> K-eg1-ACGATTCITGG-NH <sub>2</sub> | 4549(4548)             |
| 5654 | H-(KFF) <sub>3</sub> K-eg1-ATACGTTTCAT-NH <sub>2</sub> | 4508(4507)             |
| 5821 | H-(KFF) <sub>3</sub> K-eg1-ATCCGTTTAAT-NH <sub>2</sub> | 4508(4509)             |
| 5656 | H-(KFF) <sub>3</sub> K-eg1-TTTCATGGGTG-NH <sub>2</sub> | 4580(4582)             |
| 5822 | H-(KFF) <sub>3</sub> K-eg1-TTTGATGIGTG-NH <sub>2</sub> | 4580(4580)             |
| 5655 | H-(KFF) <sub>3</sub> K-eg1-GTTTCATGGGT-NH <sub>2</sub> | 4580(4578)             |

Table 6. Primers used in Real time RT-PCR.

| Primer                         | Genes   | PCR Product |
|--------------------------------|---------|-------------|
| acpP F: AACAACTTGGTCTTAAAG     | acpP    | 163 bp      |
| acpP R: GATTGAACTGTAGTGATT     |         |             |
| ftsZ F: CAGCACATGGTACAGTCT     | ftsZ    | 84 bp       |
| ftsZ R: GGCATTTCATACAGTCAAGTG  |         |             |
| zipA-F : GAGCAGATTATCGCATT     | zipA    | 170bp       |
| zipA-R : ATACGCAATACAGAGAAC    |         |             |
| polA-F : AACATTCCAATTCGTAGAC   | polA    | 143bp       |
| polA-R : TGAACCTAAGGCATCATCT   |         |             |
| 16s rRNA-F: CAAACAGGATTAGATACC | 16srRNA | 146 bp      |
| 16s rRNA-R: GTCAATTCATTGAGTTT  |         |             |

## A

|            |         |                                         |         |
|------------|---------|-----------------------------------------|---------|
| Query      | 1       | TATTAGGAACCTAAAGGTCATGGCCTCATTGGAATTTAT | 40      |
| CP054302.1 | 1665017 | TATTAGGAACCTAAAGGTCATGGCCTCATTGGAATTTAT | 1664978 |
| CP053391.1 | 165749  | TATTAGGAACCTAAAGGTCATGGCCTCATTGGAATTTAT | 165788  |
| CP048827.1 | 3682037 | TATTAGGAACCTAAAGGTCATGGCCTCATTGGAATTTAT | 3681998 |
| CP041148.1 | 188027  | TATTAGGAACCTAAAGGTCATGGCCTCATTGGAATTTAT | 188066  |
| CP050385.1 | 3532759 | TATTAGGAACCTAAAGGTCATGGCCTCATTGGAATTTAT | 3532720 |
| CP050388.1 | 3772341 | TATTAGGAACCTAAAGGTCATGGCCTCATTGGAATTTAT | 3772302 |
| CP050390.1 | 161270  | TATTAGGAACCTAAAGGTCATGGCCTCATTGGAATTTAT | 161309  |
| CP050400.1 | 3550417 | TATTAGGAACCTAAAGGTCATGGCCTCATTGGAATTTAT | 3550378 |
| CP050401.1 | 161297  | TATTAGGAACCTAAAGGTCATGGCCTCATTGGAATTTAT | 161336  |
| CP050403.1 | 219707  | TATTAGGAACCTAAAGGTCATGGCCTCATTGGAATTTAT | 219746  |
| CP051474.1 | 161234  | TATTAGGAACCTAAAGGTCATGGCCTCATTGGAATTTAT | 161273  |
| CP050421.1 | 162494  | TATTAGGAACCTAAAGGTCATGGCCTCATTGGAATTTAT | 162533  |
| CP050419.1 | 161306  | TATTAGGAACCTAAAGGTCATGGCCTCATTGGAATTTAT | 161345  |
| CP050412.1 | 162494  | TATTAGGAACCTAAAGGTCATGGCCTCATTGGAATTTAT | 162533  |
| CP050415.1 | 2918929 | TATTAGGAACCTAAAGGTCATGGCCTCATTGGAATTTAT | 2918968 |
| CP050425.1 | 178459  | TATTAGGAACCTAAAGGTCATGGCCTCATTGGAATTTAT | 178498  |
| CP050432.1 | 178383  | TATTAGGAACCTAAAGGTCATGGCCTCATTGGAATTTAT | 178422  |
| CP050523.1 | 162385  | TATTAGGAACCTAAAGGTCATGGCCTCATTGGAATTTAT | 162424  |
| CP050526.1 | 182494  | TATTAGGAACCTAAAGGTCATGGCCTCATTGGAATTTAT | 182533  |
| CP051862.1 | 3563902 | TATTAGGAACCTAAAGGTCATGGCCTCATTGGAATTTAT | 3563863 |
| CP051866.1 | 168818  | TATTAGGAACCTAAAGGTCATGGCCTCATTGGAATTTAT | 168857  |
| CP051875.1 | 163103  | TATTAGGAACCTAAAGGTCATGGCCTCATTGGAATTTAT | 163142  |
| CP051869.1 | 1107951 | TATTAGGAACCTAAAGGTCATGGCCTCATTGGAATTTAT | 1107912 |
| CP050916.1 | 161315  | TATTAGGAACCTAAAGGTCATGGCCTCATTGGAATTTAT | 161354  |
| CP050914.1 | 170946  | TATTAGGAACCTAAAGGTCATGGCCTCATTGGAATTTAT | 170985  |
| CP050921.1 | 161315  | TATTAGGAACCTAAAGGTCATGGCCTCATTGGAATTTAT | 161390  |
| CP050904.1 | 161316  | TATTAGGAACCTAAAGGTCATGGCCTCATTGGAATTTAT | 161355  |
| CP050907.1 | 161324  | TATTAGGAACCTAAAGGTCATGGCCTCATTGGAATTTAT | 161363  |
| CP049806.1 | 166325  | TATTAGGAACCTAAAGGTCATGGCCTCATTGGAATTTAT | 166364  |
| CP049363.1 | 3679090 | TATTAGGAACCTAAAGGTCATGGCCTCATTGGAATTTAT | 3679051 |
| AP022836.1 | 159694  | TATTAGGAACCTAAAGGTCATGGCCTCATTGGAATTTAT | 159733  |
| CP035109.1 | 703063  | TATTAGGAACCTAAAGGTCATGGCCTCATTGGAATTTAT | 703024  |
| CP045428.1 | 378135  | TATTAGGAACCTAAAGGTCATGGCCTCATTGGAATTTAT | 378086  |
| CP046654.1 | 1161417 | TATTAGGAACCTAAAGGTCATGGCCTCATTGGAATTTAT | 1161378 |
| CP046536.1 | 3585433 | TATTAGGAACCTAAAGGTCATGGCCTCATTGGAATTTAT | 3585394 |
| CP045560.1 | 3782585 | TATTAGGAACCTAAAGGTCATGGCCTCATTGGAATTTAT | 3782546 |
| CP042931.1 | 1160807 | TATTAGGAACCTAAAGGTCATGGCCTCATTGGAATTTAT | 1160846 |
| CP033243.1 | 167575  | TATTAGGAACCTAAAGGTCATGGCCTCATTGGAATTTAT | 167614  |
| CP045528.1 | 2757618 | TATTAGGAACCTAAAGGTCATGGCCTCATTGGAATTTAT | 2757579 |
| CP045541.1 | 239981  | TATTAGGAACCTAAAGGTCATGGCCTCATTGGAATTTAT | 239942  |
| CP045110.1 | 3839993 | TATTAGGAACCTAAAGGTCATGGCCTCATTGGAATTTAT | 3839954 |
| CP042556.1 | 25067   | TATTAGGAACCTAAAGGTCATGGCCTCATTGGAATTTAT | 25028   |
| CP032743.1 | 2712072 | TATTAGGAACCTAAAGGTCATGGCCTCATTGGAATTTAT | 2712111 |
| CP044356.1 | 3647476 | TATTAGGAACCTAAAGGTCATGGCCTCATTGGAATTTAT | 3647437 |
| CP040911.1 | 178868  | TATTAGGAACCTAAAGGTCATGGCCTCATTGGAATTTAT | 178907  |
| CP043953.1 | 161430  | TATTAGGAACCTAAAGGTCATGGCCTCATTGGAATTTAT | 161469  |
| CP043910.1 | 1216679 | TATTAGGAACCTAAAGGTCATGGCCTCATTGGAATTTAT | 1216640 |
| CP043418.1 | 166562  | TATTAGGAACCTAAAGGTCATGGCCTCATTGGAATTTAT | 166601  |
| CP043419.1 | 166462  | TATTAGGAACCTAAAGGTCATGGCCTCATTGGAATTTAT | 166501  |
| CP043417.1 | 166444  | TATTAGGAACCTAAAGGTCATGGCCTCATTGGAATTTAT | 166483  |
| CP043180.1 | 640432  | TATTAGGAACCTAAAGGTCATGGCCTCATTGGAATTTAT | 640393  |
| CP043052.1 | 166761  | TATTAGGAACCTAAAGGTCATGGCCTCATTGGAATTTAT | 166800  |
| CP042954.1 | 165348  | TATTAGGAACCTAAAGGTCATGGCCTCATTGGAATTTAT | 165387  |
| CP042841.1 | 168398  | TATTAGGAACCTAAAGGTCATGGCCTCATTGGAATTTAT | 168437  |
| CP026089.2 | 168914  | TATTAGGAACCTAAAGGTCATGGCCTCATTGGAATTTAT | 168953  |
| CP028574.2 | 3936507 | TATTAGGAACCTAAAGGTCATGGCCTCATTGGAATTTAT | 3936546 |
| CP027250.2 | 165750  | TATTAGGAACCTAAAGGTCATGGCCTCATTGGAATTTAT | 165789  |
| CP027254.3 | 192232  | TATTAGGAACCTAAAGGTCATGGCCTCATTGGAATTTAT | 192271  |
| CP027246.2 | 166450  | TATTAGGAACCTAAAGGTCATGGCCTCATTGGAATTTAT | 166489  |
| CP026759.2 | 162503  | TATTAGGAACCTAAAGGTCATGGCCTCATTGGAATTTAT | 162542  |
| CP042364.1 | 1988468 | TATTAGGAACCTAAAGGTCATGGCCTCATTGGAATTTAT | 1988429 |
| CP039028.2 | 1217725 | TATTAGGAACCTAAAGGTCATGGCCTCATTGGAATTTAT | 1217686 |
| CP019114.1 | 3751415 | TATTAGGAACCTAAAGGTCATGGCCTCATTGGAATTTAT | 3751376 |
| CP039025.2 | 1217715 | TATTAGGAACCTAAAGGTCATGGCCTCATTGGAATTTAT | 1217676 |
| CP039023.2 | 1216674 | TATTAGGAACCTAAAGGTCATGGCCTCATTGGAATTTAT | 1216635 |
| CP041587.1 | 3655582 | TATTAGGAACCTAAAGGTCATGGCCTCATTGGAATTTAT | 3655543 |
| CP041585.1 | 162136  | TATTAGGAACCTAAAGGTCATGGCCTCATTGGAATTTAT | 162175  |
| CP032055.1 | 3750309 | TATTAGGAACCTAAAGGTCATGGCCTCATTGGAATTTAT | 3750270 |
| CP040903.1 | 2983915 | TATTAGGAACCTAAAGGTCATGGCCTCATTGGAATTTAT | 2983876 |
| CP040425.1 | 161265  | TATTAGGAACCTAAAGGTCATGGCCTCATTGGAATTTAT | 161304  |
| CP031380.1 | 3773075 | TATTAGGAACCTAAAGGTCATGGCCTCATTGGAATTTAT | 3773036 |
| CP040259.1 | 892929  | TATTAGGAACCTAAAGGTCATGGCCTCATTGGAATTTAT | 892890  |
| CP032215.1 | 1345102 | TATTAGGAACCTAAAGGTCATGGCCTCATTGGAATTTAT | 1345063 |
| AP019685.1 | 163263  | TATTAGGAACCTAAAGGTCATGGCCTCATTGGAATTTAT | 163302  |

## B

NCBI Multiple Sequence Alignment Viewer, Version 1.19.1

| Sequence ID | Alignment                                                                                                 |
|-------------|-----------------------------------------------------------------------------------------------------------|
|             | 1 3 4 5 6 7 8 9 10 11 12 13 14 15 16 17 18 19 20 21 22 23 24 25 26 27 28 29 30 31 32 33 34 35 36 37 38 40 |
| Query_64123 | (+) C A C T A T T A G G T G T C A C A C C C A T G A A A C G T A T G T T G A T T A A                       |
| CP053098.1  | (-) C A C T A T T A G G T G T C A C A C C C A T G A A A C G T A T G T T G A T T A A                       |
| CP054302.1  | (-) C A C T A T T A G G T G T C A C A C C C A T G A A A C G T A T G T T G A T T A A                       |
| CP048827.1  | (-) C A C T A T T A G G T G T C A C A C C C A T G A A A C G T A T G T T G A T T A A                       |
| CP041148.1  | (+) C A C T A T T A G G T G T C A C A C C C A T G A A A C G T A T G T T G A T T A A                       |
| CP050385.1  | (-) C A C T A T T A G G T G T C A C A C C C A T G A A A C G T A T G T T G A T T A A                       |
| CP050388.1  | (-) C A C T A T T A G G T G T C A C A C C C A T G A A A C G T A T G T T G A T T A A                       |
| CP050390.1  | (+) C A C T A T T A G G T G T C A C A C C C A T G A A A C G T A T G T T G A T T A A                       |
| CP050400.1  | (-) C A C T A T T A G G T G T C A C A C C C A T G A A A C G T A T G T T G A T T A A                       |
| CP050401.1  | (+) C A C T A T T A G G T G T C A C A C C C A T G A A A C G T A T G T T G A T T A A                       |
| CP050403.1  | (+) C A C T A T T A G G T G T C A C A C C C A T G A A A C G T A T G T T G A T T A A                       |
| CP051474.1  | (+) C A C T A T T A G G T G T C A C A C C C A T G A A A C G T A T G T T G A T T A A                       |
| CP050421.1  | (+) C A C T A T T A G G T G T C A C A C C C A T G A A A C G T A T G T T G A T T A A                       |
| CP050410.1  | (+) C A C T A T T A G G T G T C A C A C C C A T G A A A C G T A T G T T G A T T A A                       |
| CP050412.1  | (+) C A C T A T T A G G T G T C A C A C C C A T G A A A C G T A T G T T G A T T A A                       |
| CP050415.1  | (+) C A C T A T T A G G T G T C A C A C C C A T G A A A C G T A T G T T G A T T A A                       |
| CP050425.1  | (+) C A C T A T T A G G T G T C A C A C C C A T G A A A C G T A T G T T G A T T A A                       |
| CP050432.1  | (+) C A C T A T T A G G T G T C A C A C C C A T G A A A C G T A T G T T G A T T A A                       |
| CP050523.1  | (+) C A C T A T T A G G T G T C A C A C C C A T G A A A C G T A T G T T G A T T A A                       |
| CP050526.1  | (+) C A C T A T T A G G T G T C A C A C C C A T G A A A C G T A T G T T G A T T A A                       |
| CP051862.1  | (-) C A C T A T T A G G T G T C A C A C C C A T G A A A C G T A T G T T G A T T A A                       |
| CP051866.1  | (+) C A C T A T T A G G T G T C A C A C C C A T G A A A C G T A T G T T G A T T A A                       |
| CP051875.1  | (+) C A C T A T T A G G T G T C A C A C C C A T G A A A C G T A T G T T G A T T A A                       |
| CP051869.1  | (-) C A C T A T T A G G T G T C A C A C C C A T G A A A C G T A T G T T G A T T A A                       |
| CP050916.1  | (+) C A C T A T T A G G T G T C A C A C C C A T G A A A C G T A T G T T G A T T A A                       |
| CP050914.1  | (+) C A C T A T T A G G T G T C A C A C C C A T G A A A C G T A T G T T G A T T A A                       |

**Figure S1.** (A) Multiple sequence alignment of *ftsZ* gene, region -20 to +20, using Basic Local Alignment Search Tool (BLAST) on the NCBI website. The BLAST results confirmed the 5' terminal region of the *ftsZ* gene including the ribosomal binding site and the start ATG codon is conserved among *A.baumannii* species. (B) Multiple sequence alignment of the *rne* gene, region -20 to +20, using BLAST on the NCBI website. The BLAST results confirmed the 5' terminal region of the *rne* gene including the ribosomal binding site and the start ATG codon is conserved among *A.baumannii* species.



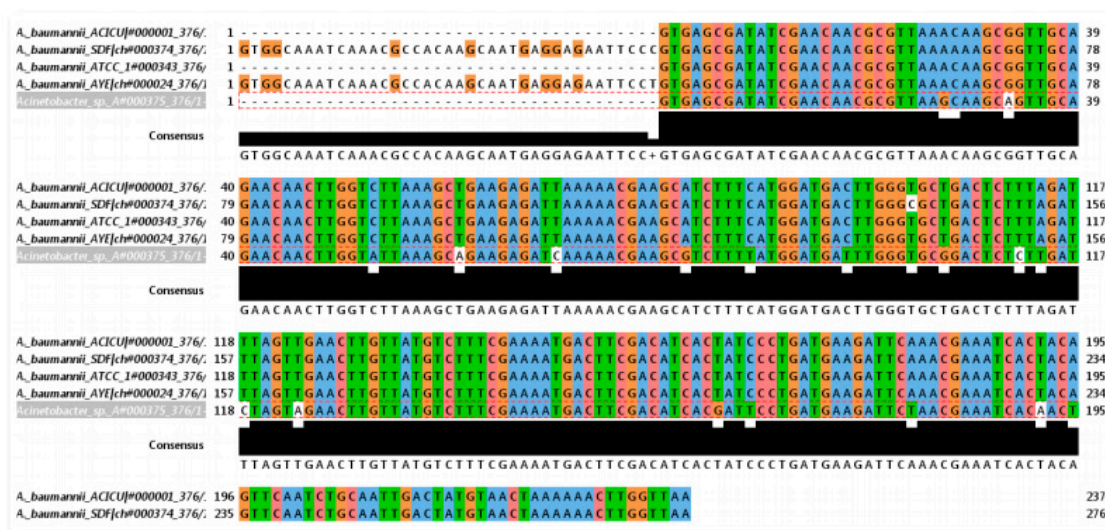

**Figure S2.** A multiple sequence alignment of *acpP* gene (GenBank database updated January 2019) using the Basic Local Alignment Search Tool (BLAST) on the NCBI website in *A. baumannii* AYE, *A. baumannii* SDF, *A. baumannii* ACICU, *A. baumannii* ATCC 17978 and *Acinetobacter* sp ADP1 (Sequence ID was represented in Table S2)[32]. The *acpP* gene has two lengths in different strains of *A. baumannii*. The *acpP* gene in *A. baumannii* ATCC19606, AYE and SDF strains was 276 bp in length while that was 237 bp in length on both ACICU and ATCC17978 strains.

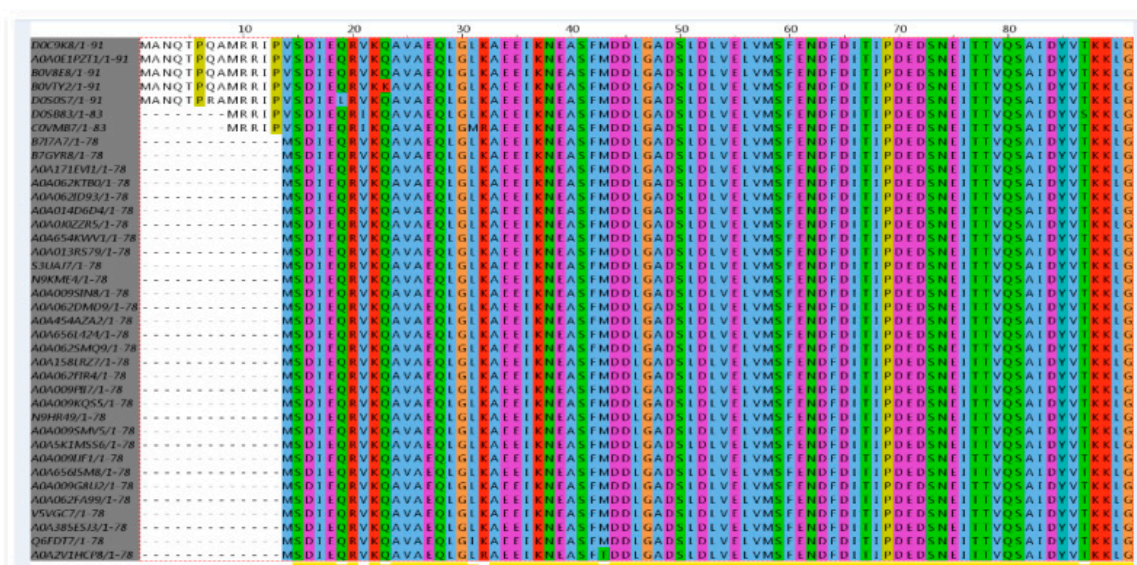

**Figure S3.** A multiple sequence alignment of AcpP proteins (UniProt updated 2019/01) using UniProt website (*A. baumannii* AYE UniProt ID: B0V8E8, *A. baumannii* SDF UniProt ID: B0VTY2 and *A. baumannii* ATCC 19606 UniProt ID: D0C9K8).

## A

## 21 Genes

| Accession Number                       | Gene Name   | Organism                                               | Replicon   | Gene Length | Location (kb) | Description          |
|----------------------------------------|-------------|--------------------------------------------------------|------------|-------------|---------------|----------------------|
| <input type="checkbox"/> ABAYE2991     | <i>acpP</i> | <i>A. baumannii</i> AYE                                | chromosome | 276         | 3018.68       | Acyl carrier protein |
| <input type="checkbox"/> JN1080        | <i>acpP</i> | <i>E. coli</i> W3110                                   | chromosome | 237         | 1153.19       | Acyl carrier protein |
| <input type="checkbox"/> UTI89_C1220   | <i>acpP</i> | <i>E. coli</i> UTI89                                   | chromosome | 237         | 1196.58       | Acyl carrier protein |
| <input type="checkbox"/> SbBS512_E2230 | <i>acpP</i> | <i>S. boydii</i> CDC 3083-94                           | chromosome | 237         | 2030.10       | Acyl carrier protein |
| <input type="checkbox"/> SBO_1969      | <i>acpP</i> | <i>S. boydii</i> Sb227                                 | chromosome | 237         | 1943.72       | Acyl carrier protein |
| <input type="checkbox"/> SCH_1144      | <i>acpP</i> | <i>S. choleraesuis</i> enterica sv Choleraesuis SC-B67 | chromosome | 237         | 1260.17       | Acyl carrier protein |
| <input type="checkbox"/> SeD_A2173     | <i>acpP</i> | <i>S. dublin</i> sv Dublin CT_02021853                 | chromosome | 237         | 2086.89       | Acyl carrier protein |
| <input type="checkbox"/> SDY_2056      | <i>acpP</i> | <i>S. dysenteriae</i> Sd197                            | chromosome | 237         | 1868.37       | Acyl carrier protein |
| <input type="checkbox"/> SEN1853       | <i>acpP</i> | <i>S. enteritidis</i> P125109                          | chromosome | 237         | 1958.59       | Acyl carrier protein |
| <input type="checkbox"/> SFV_1114      | <i>acpP</i> | <i>S. flexneri</i> 5 8401                              | chromosome | 237         | 1157.41       | Acyl carrier protein |
| <input type="checkbox"/> S1178         | <i>acpP</i> | <i>S. flexneri</i> 2a 2457T                            | chromosome | 237         | 1142.22       | Acyl carrier protein |
| <input type="checkbox"/> CP0124        | <i>acpP</i> | <i>S. flexneri</i> 2a 301                              | pCP301     | 237         | 107.17        | Acyl carrier protein |
| <input type="checkbox"/> SF1098        | <i>acpP</i> | <i>S. flexneri</i> 2a 301                              | chromosome | 237         | 1139.33       | Acyl carrier protein |
| <input type="checkbox"/> SG1926        | <i>acpP</i> | <i>S. gallinarum</i> 287/91                            | chromosome | 237         | 1991.33       | Acyl carrier protein |
| <input type="checkbox"/> SPAB_02327    | <i>acpP</i> | <i>S. paratyphi</i> enterica sv Paratyphi B SPB7       | chromosome | 237         | 1928.49       | Acyl carrier protein |
| <input type="checkbox"/> SPA1655       | <i>acpP</i> | <i>S. paratyphi</i> enterica sv Paratyphi A ATCC 9150  | chromosome | 237         | 1720.08       | Acyl carrier protein |
| <input type="checkbox"/> SeSA_A1266    | <i>acpP</i> | <i>S. schwarzengrund</i> sv Schwarzengrund CVM19633    | chromosome | 237         | 1238.41       | Acyl carrier protein |
| <input type="checkbox"/> SSON_1114     | <i>acpP</i> | <i>S. sonnei</i> Ss046                                 | chromosome | 237         | 1192.91       | Acyl carrier protein |
| <input type="checkbox"/> STY1235       | <i>acpP</i> | <i>S. typhi</i> CT18                                   | chromosome | 237         | 1189.78       | Acyl carrier protein |
| <input type="checkbox"/> t1724         | <i>acpP</i> | <i>S. typhi</i> enterica sv Typhi Ty2                  | chromosome | 237         | 1791.40       | Acyl carrier protein |
| <input type="checkbox"/> STM1196       | <i>acpP</i> | <i>S. typhimurium</i> LT2                              | chromosome | 237         | 1280.11       | Acyl carrier protein |



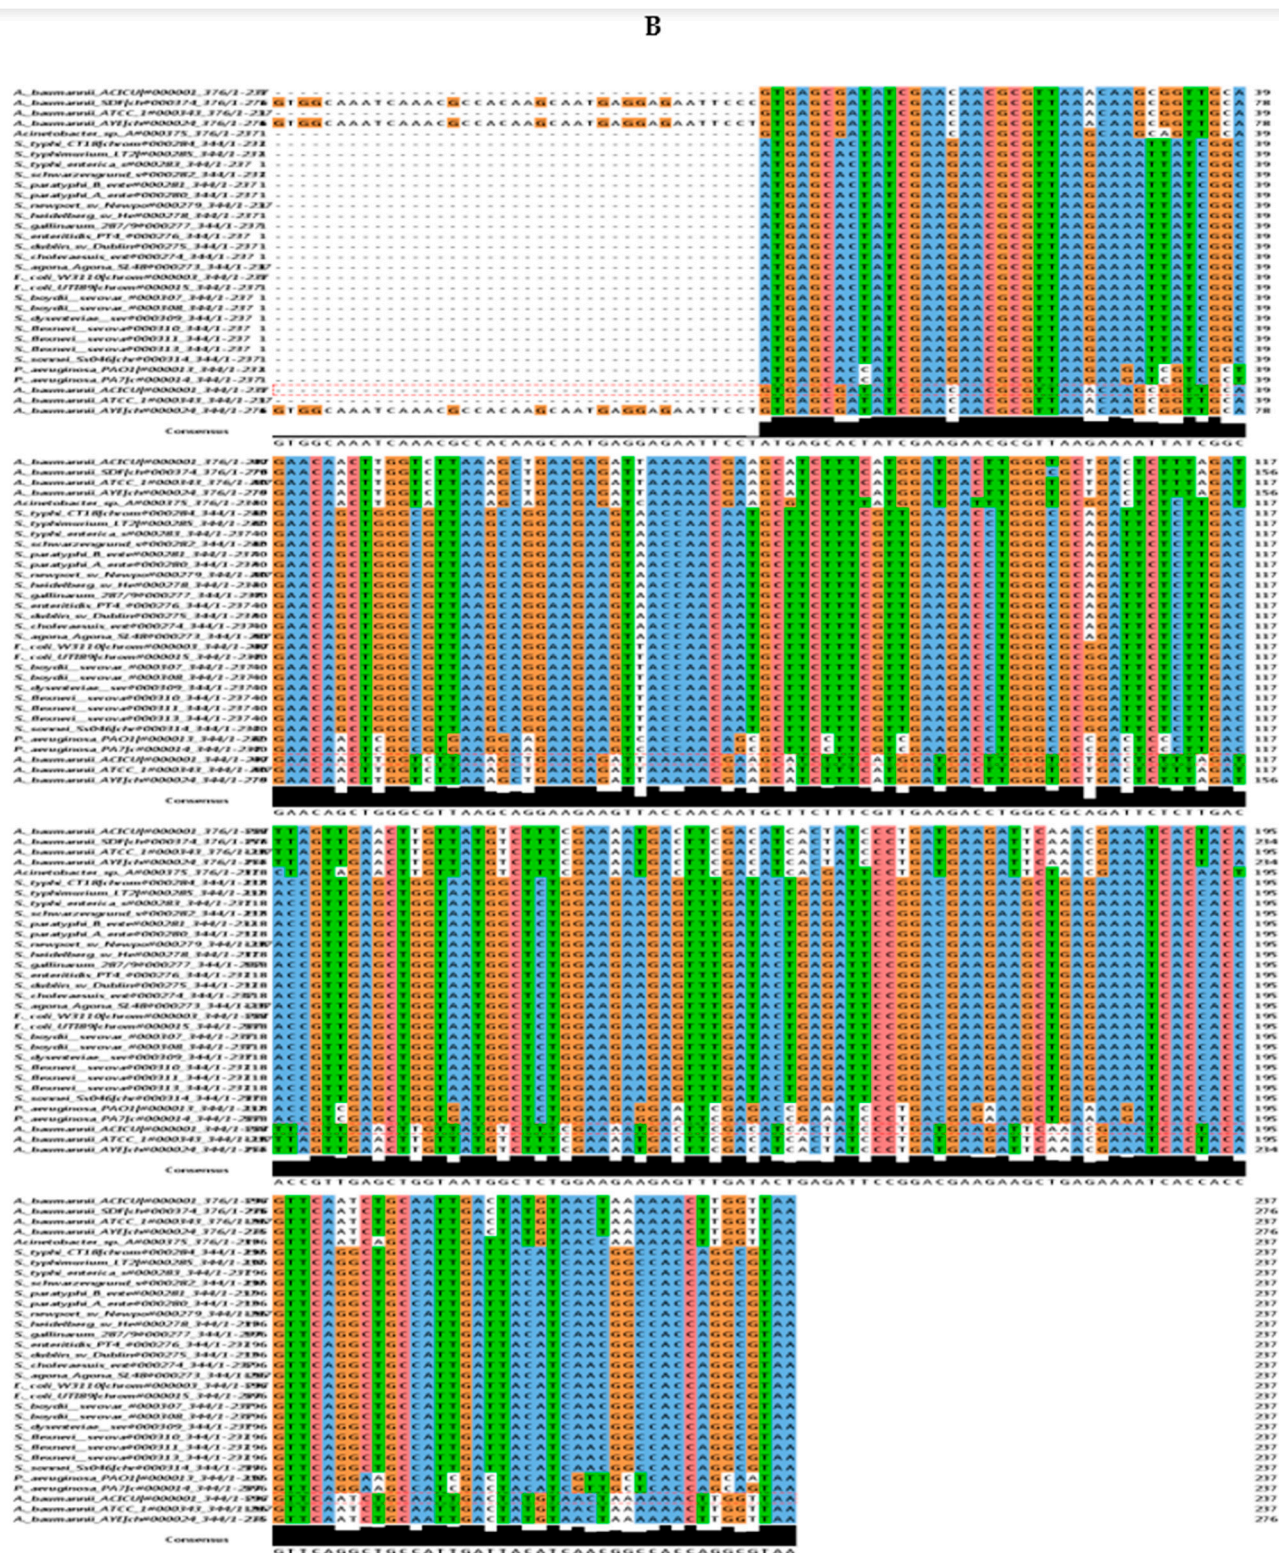

**Figure S4.** (A) The sequence of the *acpP* gene in *A.baumannii* and the other gram negative bacteria was obtained from genolist database[32]. (B) Multiple sequence alignment of *acpP* gene was done for determination of conserved regions.

(A)

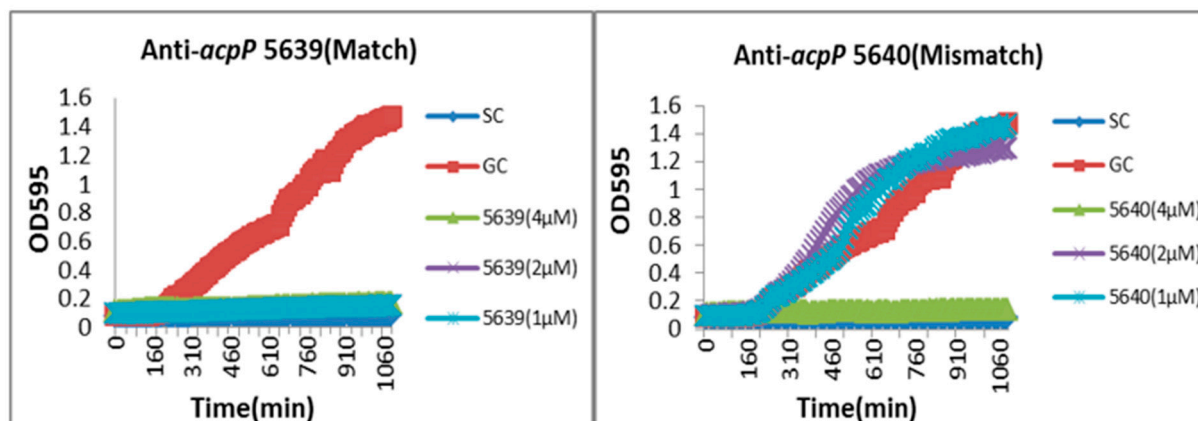



(B)

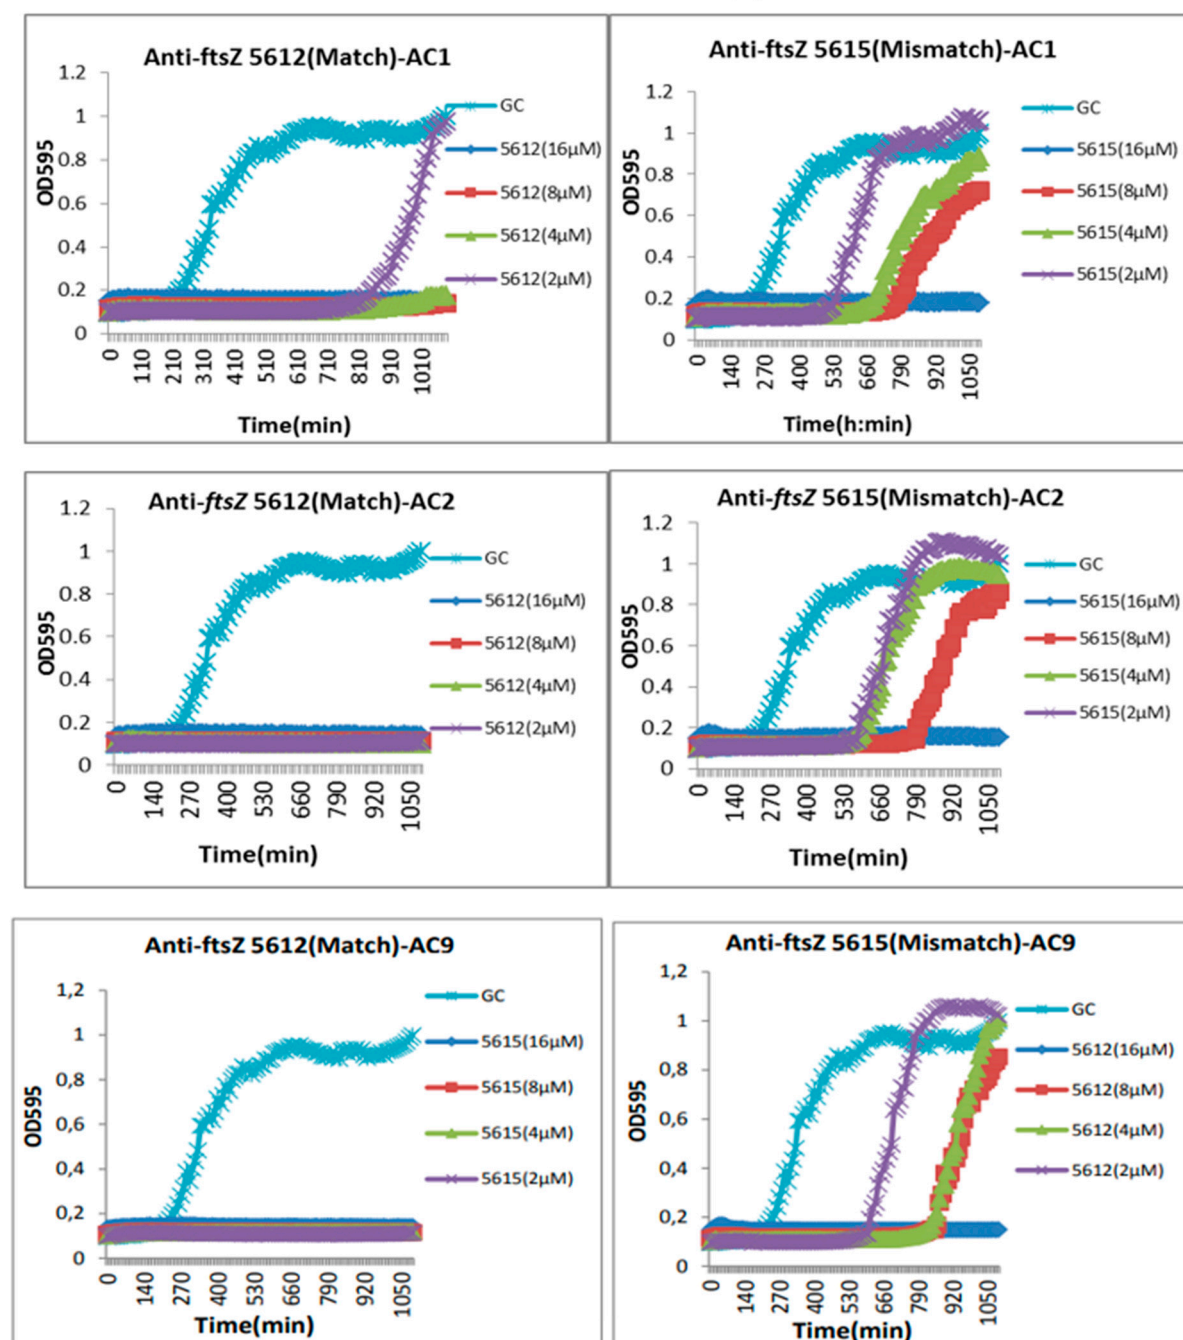

**Figure S5.** (A) Growth inhibition activity curve of the most active anti-*acpP* (KFF)<sub>3</sub>K-PNA(5639) and a corresponding mismatch control (5640) against CRAB strain (AC44). (B) Growth inhibition activity of the most active anti-*ftsZ* (KFF)<sub>3</sub>K-PNA(5612) and a corresponding mismatch control (5615) against three CRAB strains (AC1, AC2 and AC9). Concentration-dependent growth inhibition of anti-*ftsZ* (KFF)<sub>3</sub>K-PNA(5612) and a corresponding mismatch controls on the growth of three CRAB strains (AC1, AC2 and AC9). Bacteria were grown in the absence of PNA (GC) and different doses of peptide-PNA conjugates (2 μM to 16 μM).

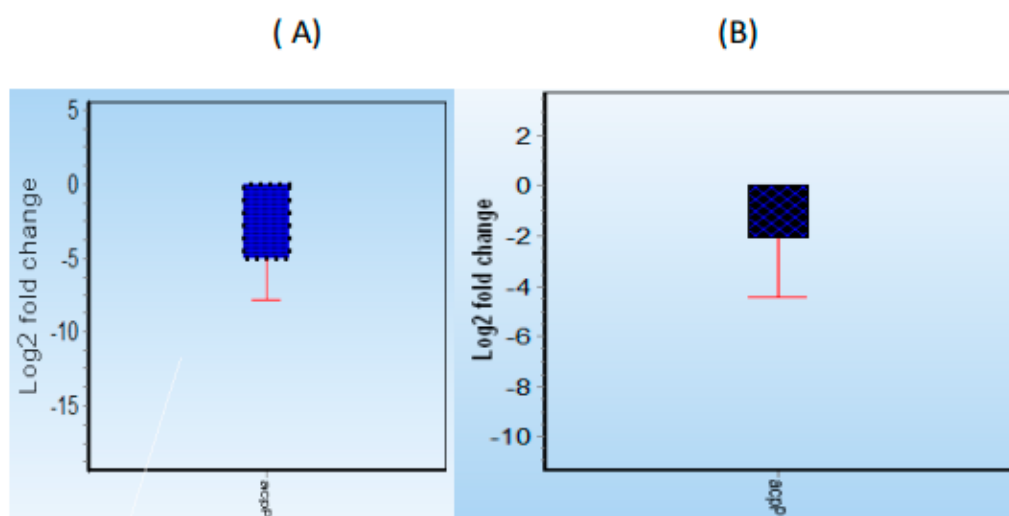

**Figure S6.** (A) Log2-fold change values determined by qPCR for *acpP* mRNA in CRAB AC44 strain, 1 hour treated with different concentration of anti-*acpP* (KFF)<sub>3</sub>K-PNA 5639 (match) compared to the untreated sample. (B) Log2-fold change values determined by qPCR for *acpP* mRNA in CRAB AC44 strain, 1 hour treated with different concentration of anti-*acpP* (KFF)<sub>3</sub>K-PNA 5640 (Mismatch) compared with the untreated sample. P values were calculated between (A) match and untreated sample (P-Value = 0.01) and (B) Mismatch and untreated sample (P-Value = 0.059) using twotailed Student's t-test (P<0.05 was considered as significant). Values shown in the graphs are the mean of three replicates. Error bars depict standard error of the mean.

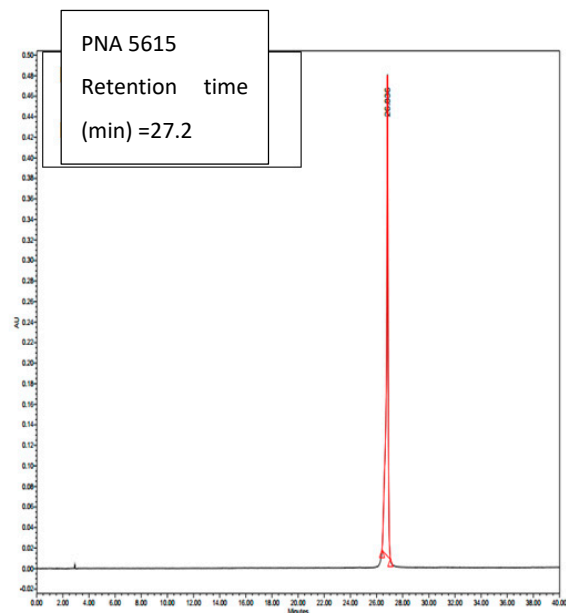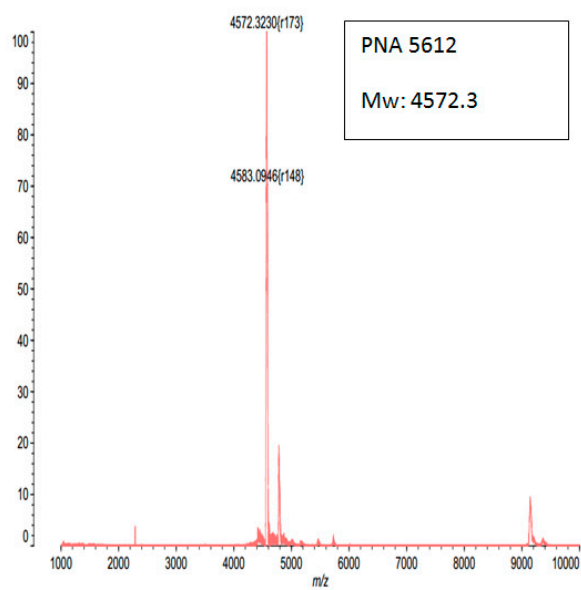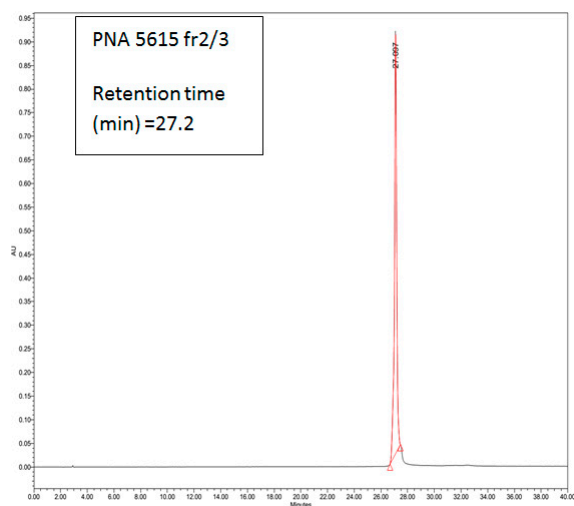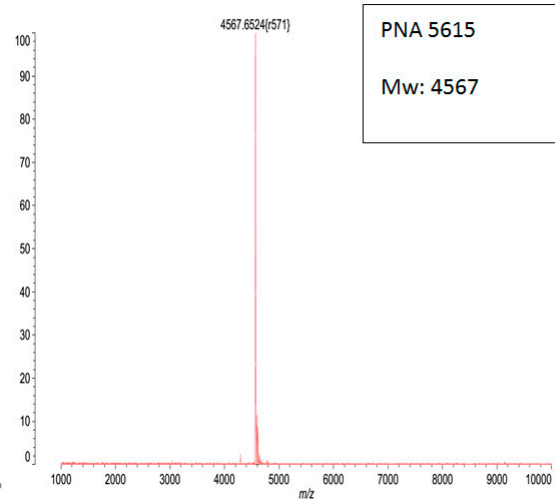



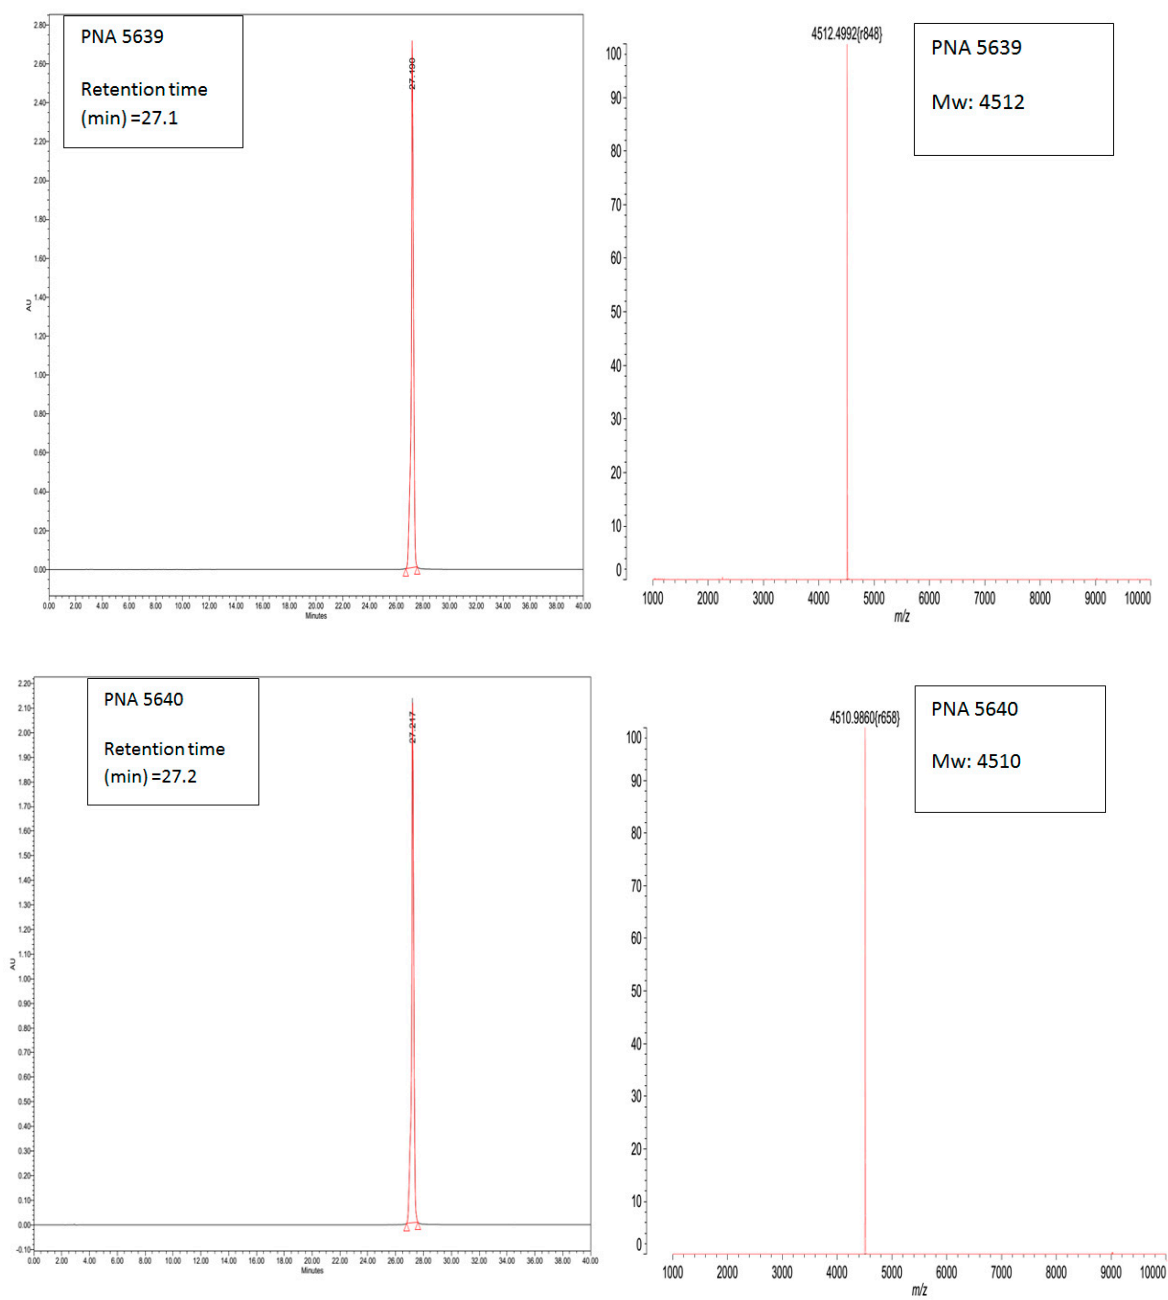

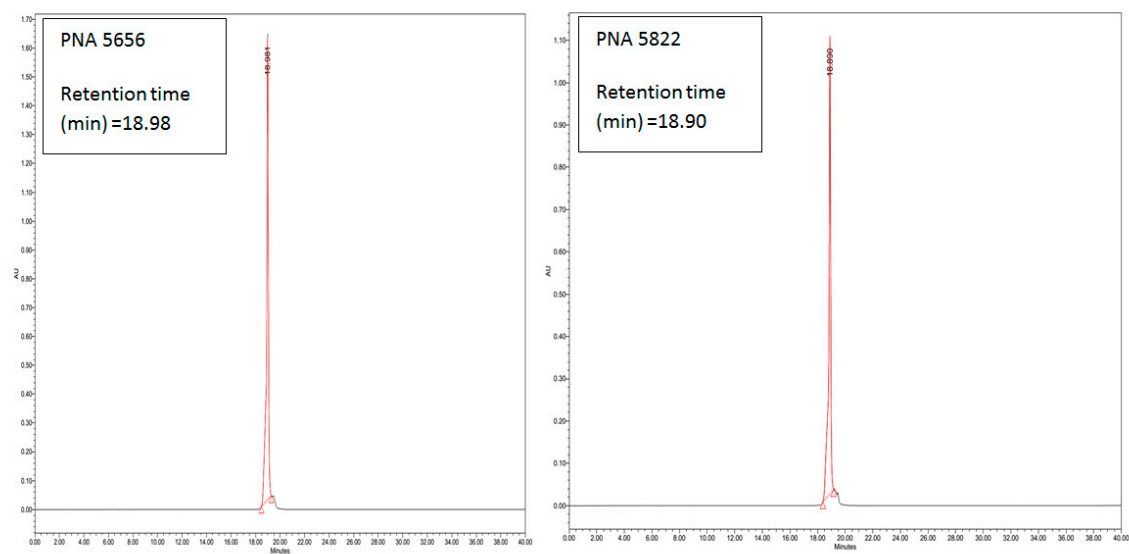

**Figure S7.** Analytical HPLC and MALDI-TOF mass spectrometry results of the most active BPP-PNAs.
